# Supplementary material
Source: publisher figshare collection journal article supplement (https://acs.figshare.com/ndownloader/files/3914812)
Supplement: Supplementary file 1 [file 3914812]

Submitted to *Cryst. Growth Des.*

Version of May 19, 2014

## **Supporting Information**

### **Molecular Networks**

#### **Created by Charge-Assisted Hydrogen Bonding**

#### **in Phosphonate, Phosphate, and Sulfonate Salts of Bis(amidines)**

Sharon Lie, Thierry Maris, and James D. Wuest\*

*Département de Chimie, Université de Montréal, Montréal, Québec H3C 3J7*

*Canada*

\*Author to whom correspondence may be addressed. E-mail:  
james.d.wuest@umontreal.ca

| Contents                                                                                                                                                                                                | Page |
|---------------------------------------------------------------------------------------------------------------------------------------------------------------------------------------------------------|------|
| I. <b>Figure S1.</b> Thermal atomic displacement ellipsoid plot of the structure of crystals of $(\text{H}_2\text{BI}^{+2}) (\text{H}_2\text{BDP}^{-2})$ .                                              | S3   |
| II. <b>Figure S2.</b> Thermal atomic displacement ellipsoid plot of the structure of crystals of $(\text{H}_2\text{BI}^{+2}) (\text{H}_2\text{BDP}^{-2}) \cdot 2\text{DMSO}$ .                          | S4   |
| III. <b>Figure S3.</b> Thermal atomic displacement ellipsoid plot of the structure of crystals of $(\text{H}_2\text{BI}^{+2}) (\text{H}_2\text{BDP}^{-2}) \cdot 4\text{H}_2\text{O}$ .                  | S5   |
| IV. <b>Figure S4.</b> Thermal atomic displacement ellipsoid plot of the structure of crystals of $(\text{H}_2\text{BI}^{+2}) (\text{H}_4\text{BTP}^{-2}) \cdot \text{DMSO}$ .                           | S6   |
| V. <b>Figure S5.</b> Thermal atomic displacement ellipsoid plot of the structure of crystals of $(\text{HFF}^+) (\text{BDS}^{-2}) \cdot 4\text{DMSO}$                                                   | S7   |
| VI. <b>Figure S6.</b> Thermal atomic displacement ellipsoid plot of the structure of crystals of $(\text{H}_2\text{FF}^{+2}) [\text{PO}_2(\text{OH})_2]_2 \cdot \text{H}_2\text{O}$                     | S8   |
| VII. <b>Figure S7.</b> Comparison of calculated and experimental X-ray powder diffraction patterns for crystals of $(\text{H}_2\text{BI}^{+2}) (\text{H}_2\text{BDP}^{-2}) \cdot 4\text{H}_2\text{O}$ . | S9   |
| VIII. <b>Figure S8.</b> Comparison of calculated and experimental X-ray powder diffraction patterns for crystals of $(\text{H}_2\text{BI}^{+2}) (\text{H}_4\text{BTP}^{-2}) \cdot \text{DMSO}$ .        | S10  |
| IX. <b>Figure S9.</b> Comparison of calculated and experimental X-ray powder diffraction patterns for crystals of $(\text{HFF}^+) (\text{BDS}^{-2}) \cdot 4\text{DMSO}$ .                               | S11  |

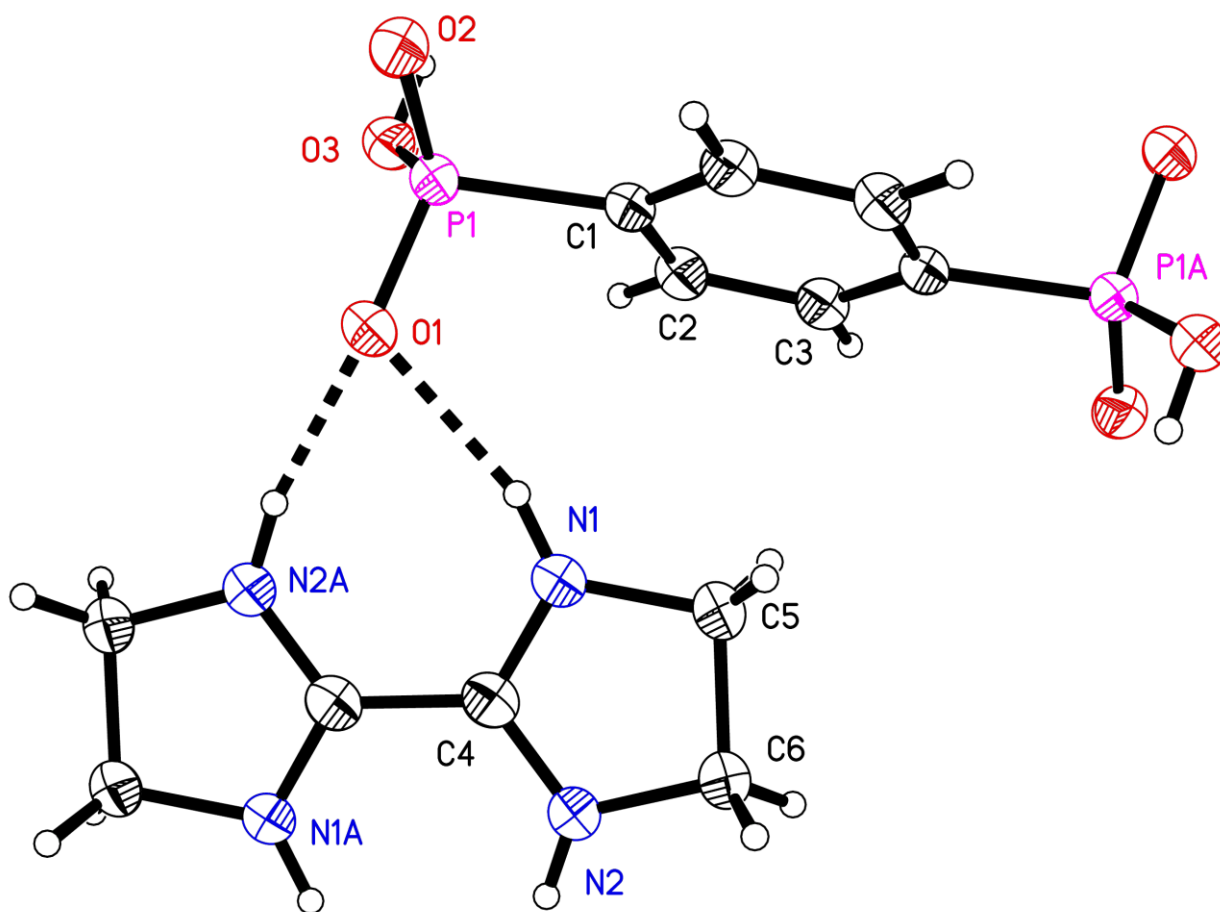

**Figure S1.** Thermal atomic displacement ellipsoid plot of the structure of crystals of  $(\text{H}_2\text{BI}^{+2})(\text{H}_2\text{BDP}^{-2})$  grown from DMSO. The ellipsoids of non-hydrogen atoms are drawn at the 50% probability level, and hydrogen atoms are represented by a sphere of arbitrary size. Hydrogen bonds are shown as dotted lines.

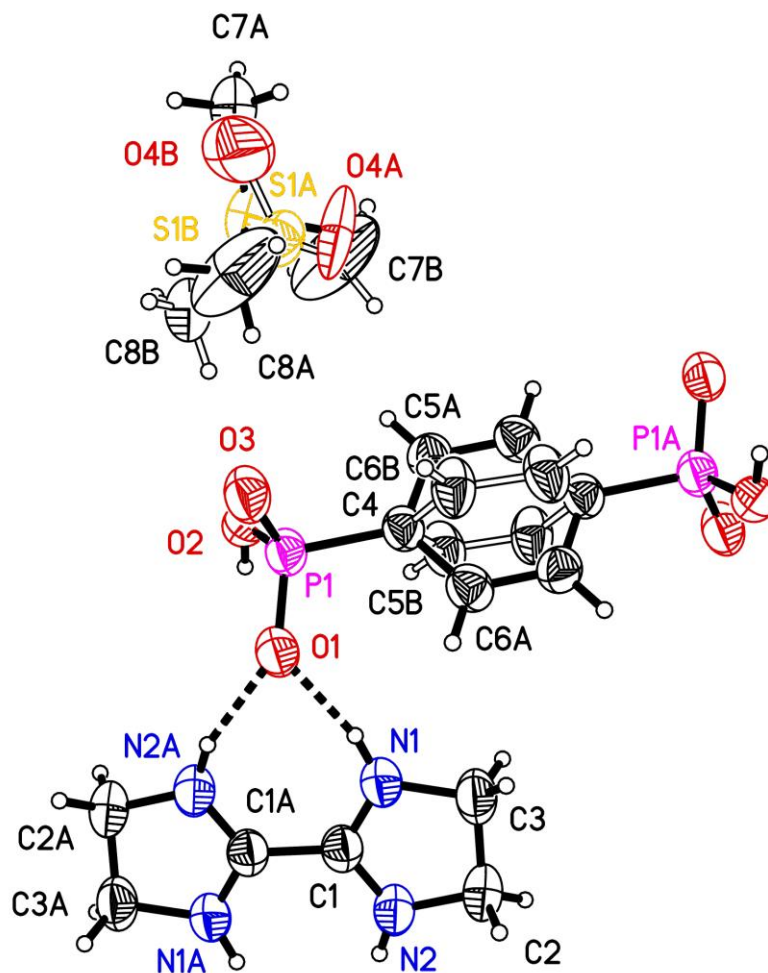

**Figure S2.** Thermal atomic displacement ellipsoid plot of the structure of crystals of  $(\text{H}_2\text{BI}^{+2})(\text{H}_2\text{BDP}^{-2}) \cdot 2\text{DMSO}$  grown from DMSO. The ellipsoids of non-hydrogen atoms are drawn at the 50% probability level, and hydrogen atoms are represented by a sphere of arbitrary size. Hydrogen bonds are shown as dotted lines. Atoms labeled with the suffix B are from the second part of the statistically disordered fragments.

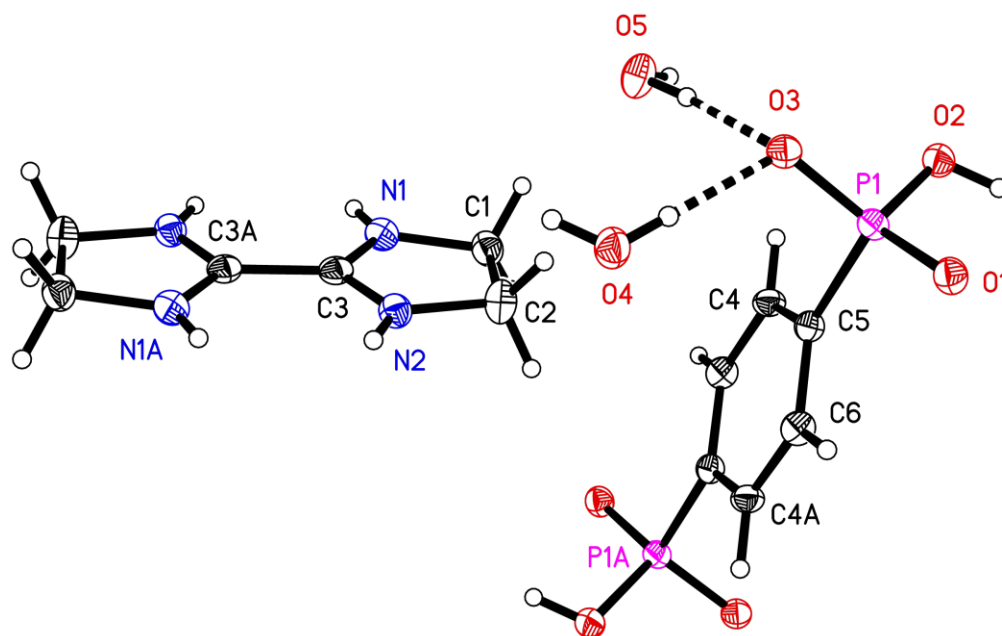

**Figure S3.** Thermal atomic displacement ellipsoid plot of the structure of crystals of  $(\text{H}_2\text{BI}^{+2})(\text{H}_2\text{BDP}^{-2}) \cdot 4\text{H}_2\text{O}$  grown from EtOH/ $\text{H}_2\text{O}$ . The ellipsoids of non-hydrogen atoms are drawn at the 50% probability level, and hydrogen atoms are represented by a sphere of arbitrary size. Hydrogen bonds are shown as dotted lines.

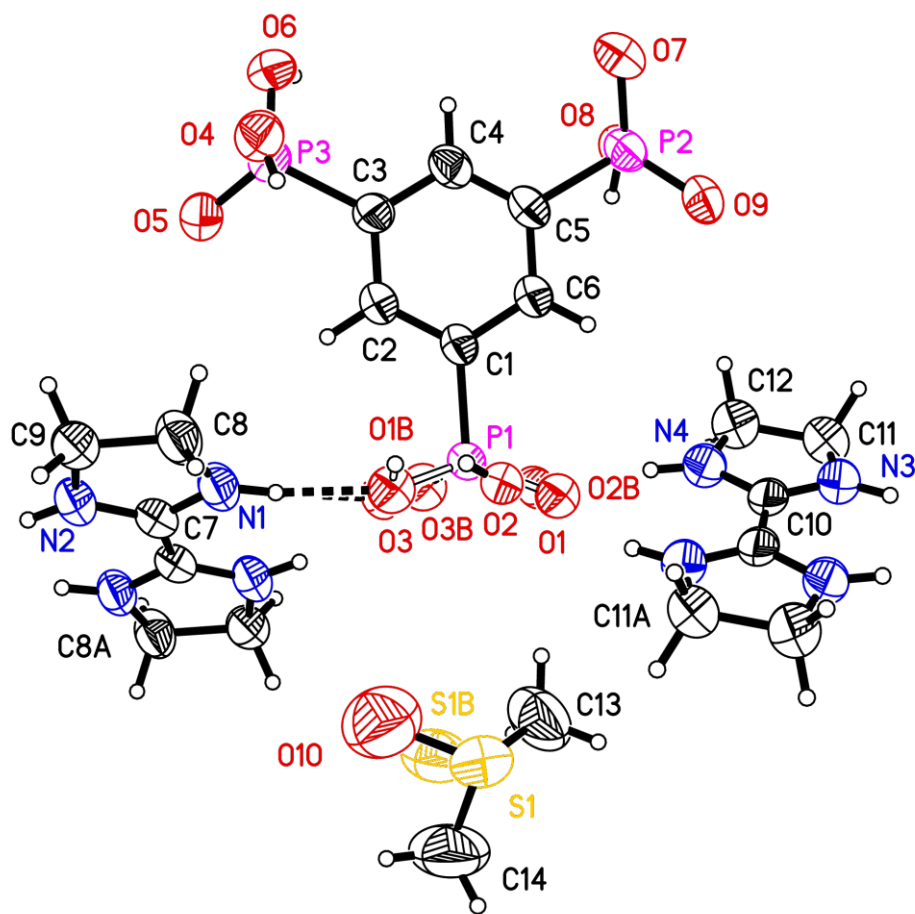

**Figure S4.** Thermal atomic displacement ellipsoid plot of the structure of crystals of  $(\text{H}_2\text{BI}^{+2})(\text{H}_4\text{BTP}^{-2}) \cdot \text{DMSO}$  grown from DMSO. The ellipsoids of non-hydrogen atoms are drawn at the 50% probability level, and hydrogen atoms are represented by a sphere of arbitrary size. Hydrogen bonds are shown as dotted lines. Atoms labeled with a suffix B are from the second part of the statistically disordered fragments.

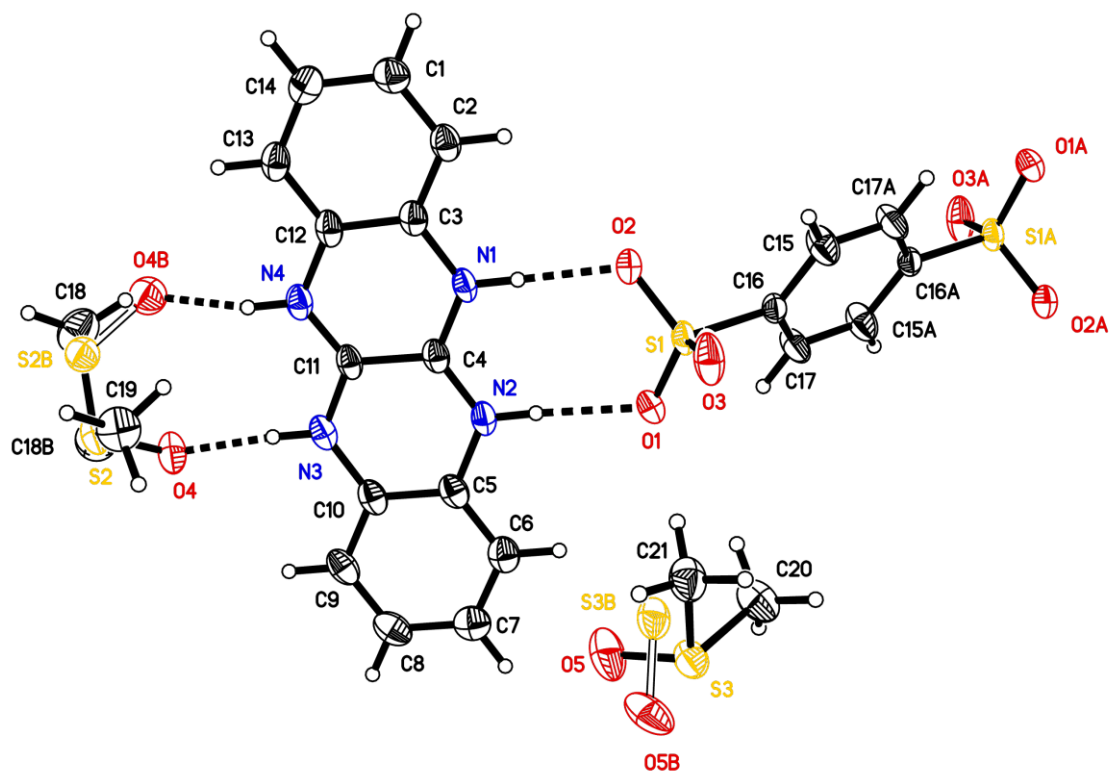

**Figure S5.** Thermal atomic displacement ellipsoid plot of the structure of crystals of  $(\text{HFF}^+)_2(\text{BDS}^{2-}) \cdot 4\text{DMSO}$  grown from DMSO. The ellipsoids of non-hydrogen atoms are drawn at the 50% probability level, and hydrogen atoms are represented by a sphere of arbitrary size. Hydrogen bonds are shown as dotted lines. Atoms labeled with the suffix A are symmetry-equivalent. Atoms labeled with the suffix B are from the second part of the statistically disordered fragments.

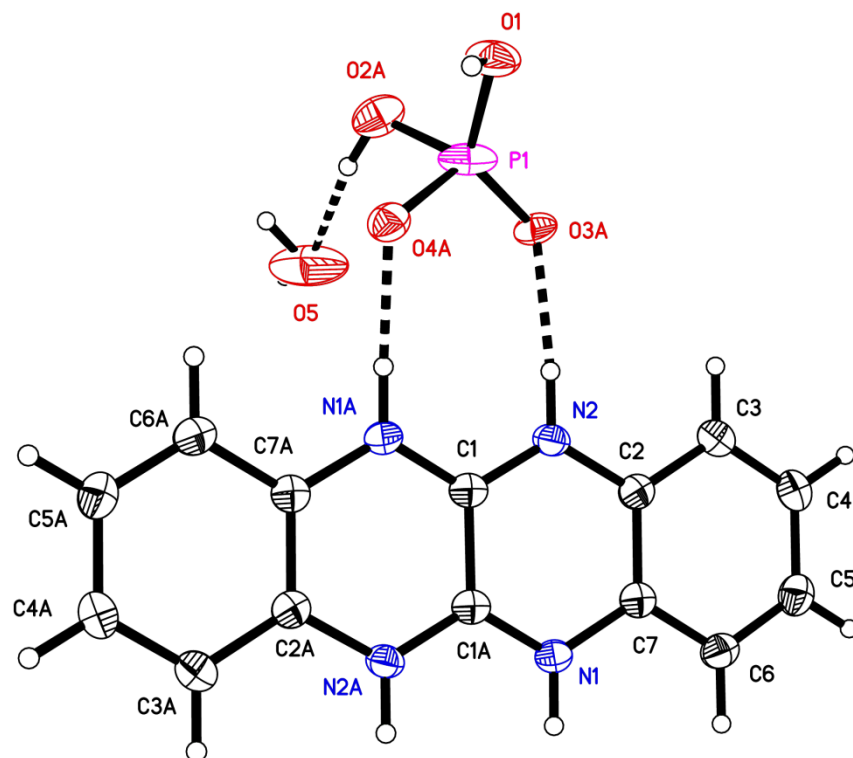

**Figure S6.** Thermal atomic displacement ellipsoid plot of the structure of crystals of  $(\text{H}_2\text{FF}^{+2})[\text{PO}_2(\text{OH})_2]_2 \cdot \text{H}_2\text{O}$  grown from heptanoic acid. The ellipsoids of non-hydrogen atoms are drawn at the 50% probability level, and hydrogen atoms are represented by a sphere of arbitrary size. Hydrogen bonds are shown as dotted lines. Only one part of the disordered phosphate anion and water molecule is shown.



### X-Ray Powder Diffraction

The experimental patterns were measured on a Bruker D8 Discover diffractometer at 295 K with copper radiation ( $\text{CuK}\alpha$ ,  $\lambda = 1.5418 \text{ \AA}$ ). The calculated diffraction patterns were generated from the crystal structure at 100 K or 150 K using Mercury software (<http://www.ccdc.cam.ac.uk/products/mercury/>).

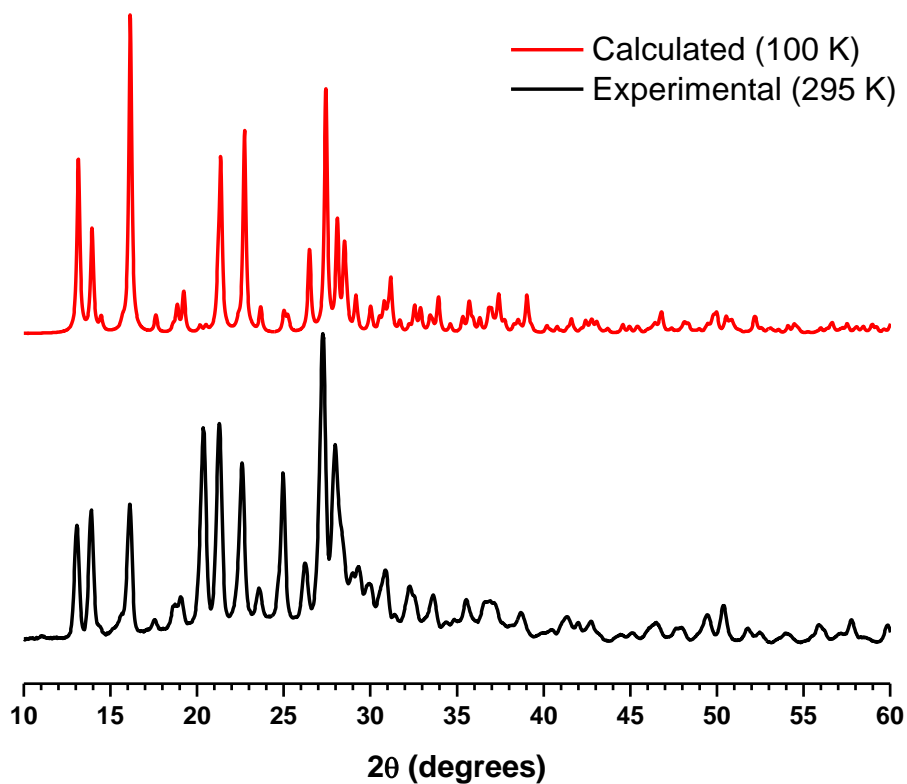

**Figure S7.** Comparison of calculated and experimental X-ray powder diffraction patterns for crystals of  $(\text{H}_2\text{BI}^{+2})(\text{H}_2\text{BDP}^{-2}) \cdot 4\text{H}_2\text{O}$  grown from EtOH/ $\text{H}_2\text{O}$ .

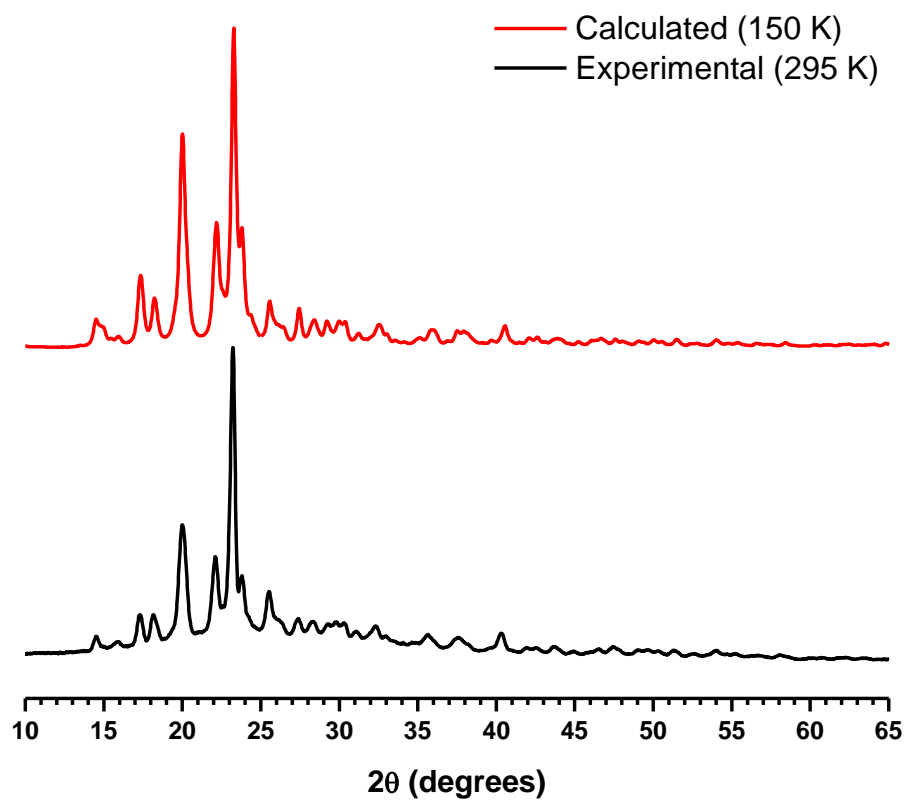

**Figure S8.** Comparison of calculated and experimental X-ray powder diffraction patterns for crystals of  $(\text{H}_2\text{BI}^{+2})(\text{H}_4\text{BTP}^{-2}) \cdot \text{DMSO}$  grown from DMSO.

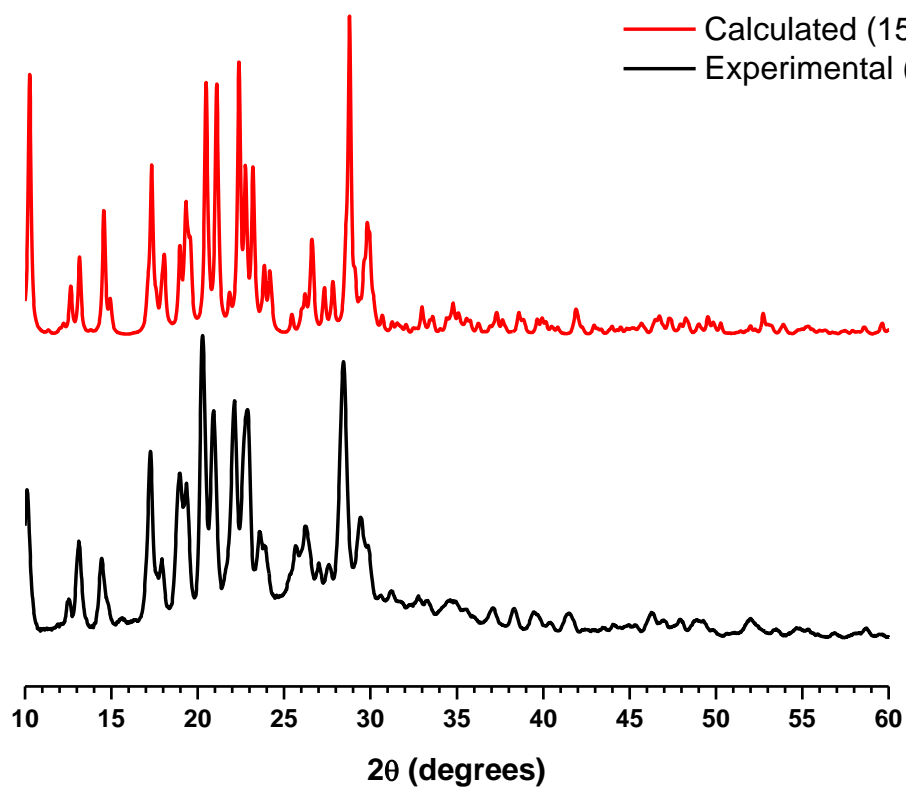

**Figure S9.** Comparison of calculated and experimental X-ray powder diffraction patterns for crystals of  $(\text{HFF}^+)(\text{BDS}^{2-}) \cdot 4\text{DMSO}$  grown from DMSO.
